# Supplementary material for: Time trends and sex differences in associations between socioeconomic status indicators and overweight-obesity in Mexico (2006–2012)
Source: PubMed Central journal article supplement (PMC4682269; doi:10.1186/s12889-015-2608-2), 2015-12-16
Supplement: 12889_2015_2608_MOESM3_ESM.pdf [file 12889_2015_2608_MOESM3_ESM.pdf]

### Additional File 3. Interaction tests with area of residence

We included interaction terms of area of residence [0=urban, 1=rural] with all covariates in our original models which already had all up three way interactions of survey year and sex with SES indicators. For each sex-year combination (men in 2006, men in 2012, women in 2006 and women in 2012), joint significance tests were performed for the group of parameters related to the covariate. For example, occupational status has one reference category and two indicator (0/1) variables of the rest of categories. In the reference group (e.g. men in 2006) we tested for the joint significance of these two terms with area of residence. For any of the other sex-year groups, the proper coefficients can be obtained as linear combinations of model coefficients or equivalently the group of interest (e.g. Women in 2012) can be set as reference category to facilitate implementation.

**Table AF3-1. Joint significance tests for interactions with area of residence for a given sex and survey year category from the overweight plus obesity logistic regression model**

|                     | 2006               |       | 2012                      |              |
|---------------------|--------------------|-------|---------------------------|--------------|
|                     | Statistic          | P     | Statistic                 | P            |
| <b>Men</b>          |                    |       |                           |              |
| Wealth              | F( 2, 2800) = 0.11 | 0.894 | <b>F( 2, 2800) = 3.07</b> | <b>0.047</b> |
| Education           | F( 4, 2798) = 1.46 | 0.212 | <b>F( 4, 2798) = 2.10</b> | <b>0.079</b> |
| Marital status      | F( 2, 2800) = 1.68 | 0.188 | F( 2, 2800) = 0.80        | 0.452        |
| Occupational status | F( 3, 2799) = 1.10 | 0.346 | F( 3, 2799) = 0.21        | 0.893        |
| Age                 | F( 2, 2800) = 1.60 | 0.202 | F( 2, 2800) = 0.65        | 0.523        |
| Region              | F( 2, 2800) = 1.58 | 0.206 | F( 2, 2800) = 1.25        | 0.287        |
| <b>Women</b>        |                    |       |                           |              |
| Wealth              | F( 2, 2800) = 0.44 | 0.642 | F( 2, 2800) = 1.10        | 0.333        |
| Education           | F( 4, 2798) = 1.83 | 0.120 | F( 4, 2798) = 0.93        | 0.444        |
| Marital status      | F( 2, 2800) = 2.26 | 0.104 | F( 2, 2800) = 0.34        | 0.714        |
| Occupational status | F( 3, 2799) = 0.47 | 0.704 | F( 3, 2799) = 0.41        | 0.747        |
| Age                 | F( 2, 2800) = 3.31 | 0.037 | F( 2, 2800) = 0.02        | 0.981        |
| Region              | F( 2, 2800) = 0.64 | 0.526 | F( 2, 2800) = 0.02        | 0.985        |

**Table AF3-2. Joint significance tests for interactions with area of residence for a given sex and survey year category from the obesity logistic regression model**

|                     | 2006                      |              | 2012                      |              |
|---------------------|---------------------------|--------------|---------------------------|--------------|
|                     | Statistic                 | P            | Statistic                 | P            |
| <b>Men</b>          |                           |              |                           |              |
| Wealth              | F( 2, 2800) = 0.96        | 0.382        | <b>F( 2, 2800) = 2.71</b> | <b>0.067</b> |
| Education           | F( 4, 2798) = 0.40        | 0.807        | F( 4, 2798) = 1.47        | 0.209        |
| Marital status      | F( 2, 2800) = 1.22        | 0.297        | F( 2, 2800) = 0.62        | 0.540        |
| Occupational status | F( 3, 2799) = 1.45        | 0.227        | F( 3, 2799) = 0.34        | 0.798        |
| Age                 | F( 2, 2800) = 1.41        | 0.244        | F( 2, 2800) = 0.64        | 0.527        |
| Region              | F( 2, 2800) = 0.49        | 0.610        | F( 2, 2800) = 0.87        | 0.419        |
| <b>Women</b>        |                           |              |                           |              |
| Wealth              | F( 2, 2800) = 1.84        | 0.159        | F( 2, 2800) = 0.47        | 0.626        |
| Education           | F( 4, 2798) = 0.34        | 0.848        | F( 4, 2798) = 0.93        | 0.445        |
| Marital status      | <b>F( 2, 2800) = 2.70</b> | <b>0.067</b> | F( 2, 2800) = 0.24        | 0.786        |
| Occupational status | F( 3, 2799) = 0.99        | 0.394        | F( 3, 2799) = 0.25        | 0.858        |
| Age                 | F( 2, 2800) = 0.29        | 0.745        | F( 2, 2800) = 0.23        | 0.798        |
| Region              | F( 2, 2800) = 0.18        | 0.834        | F( 2, 2800) = 1.03        | 0.359        |
