# Supplementary material for: Time trends and sex differences in associations between socioeconomic status indicators and overweight-obesity in Mexico (2006–2012)
Source: BMC Public Health. 2015 Dec 16;15:1244. doi: 10.1186/s12889-015-2608-2 (PMC4682269; doi:10.1186/s12889-015-2608-2)
Supplement: Additional file 4: — Wealth relationships with OWOB and obesity using equally spaced wealth categories. (PDF 93 kb) [file 12889_2015_2608_MOESM4_ESM.pdf]

#### Additional File 4. Wealth relationships with OWOB and obesity using equally spaced wealth categories

Our main models for OWOB and obesity were estimated with a categorical wealth variable instead of a continuous type indicator. Categories were defined to be equally spaced (except for the extremes) through the formula

$$\text{Wealth category} = \text{round}(7(\text{wealth} - \min(\text{wealth})) / (\max(\text{wealth}) - \min(\text{wealth}))) + 1$$

Where the round function rounds the number to the nearest integer,  $\min(\text{wealth})$  is the minimum or lowest value of the wealth indicator and  $\max(\text{wealth})$  the maximum or highest value of the wealth indicator

**Table AF4-1. Wealth categories and sample sizes**

| Wealth Category | Sample sizes |          |            |            | Wealth index |        |
|-----------------|--------------|----------|------------|------------|--------------|--------|
|                 | Men 2006     | Men 2012 | Women 2006 | Women 2012 | Min          | Max    |
| 1               | 55           | 45       | 70         | 58         | -3.859       | -3.480 |
| 2               | 258          | 240      | 381        | 255        | -3.439       | -2.704 |
| 3               | 609          | 719      | 987        | 877        | -2.696       | -1.922 |
| 4               | 1,085        | 1,368    | 1,614      | 1,765      | -1.920       | -1.148 |
| 5               | 2,479        | 2,903    | 4,038      | 4,175      | -1.147       | -0.373 |
| 6               | 4,230        | 4,883    | 6,490      | 6,996      | -0.373       | 0.398  |
| 7               | 3,137        | 3,927    | 4,517      | 5,328      | 0.402        | 1.168  |
| 8               | 667          | 1,055    | 841        | 1,257      | 1.206        | 1.563  |
| Total           | 12520        | 15140    | 18938      | 20711      | -3.859       | 1.563  |

**Figure AF4-1. Wealth-OWOB relationship from a model with equally spaced wealth index categories**

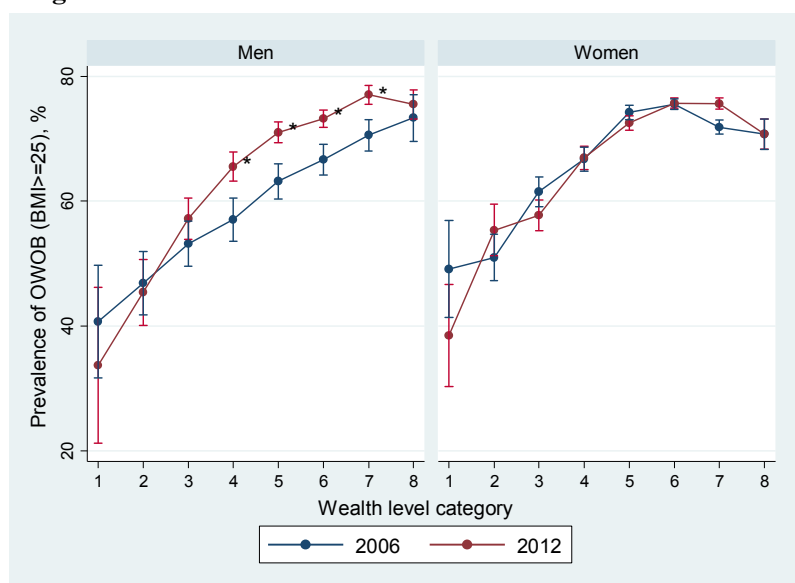

Error bars represent standard errors. \* $p < 0.05$  2012 vs 2006

**Figure AF4-2. Wealth-obesity relationship from a model with equally spaced wealth index categories**

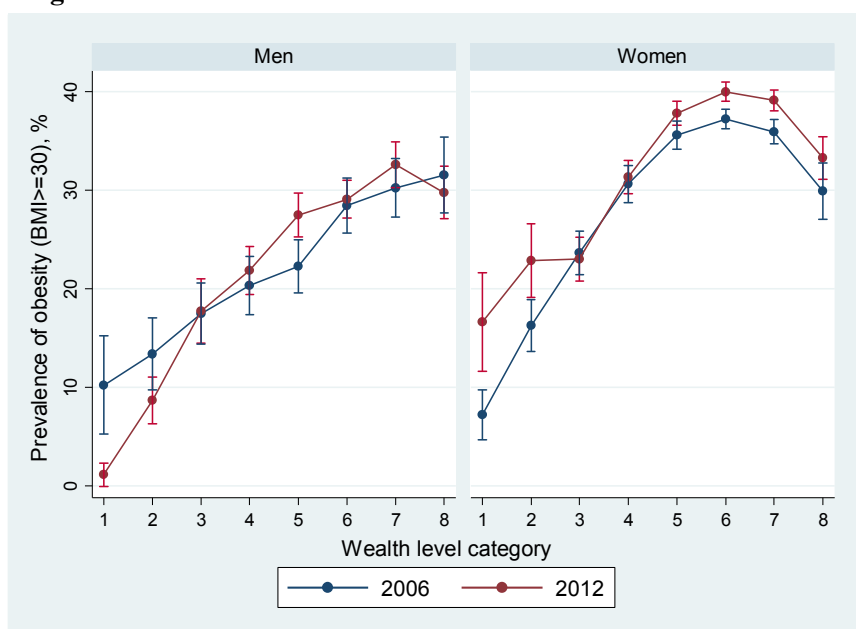

Error bars represent standard errors. No significant differences were found between 2006 and 2012.

In women at levels 6 and 7, p-values were near to the significance level ( $p=0.053$  and  $p=0.051$ , respectively).
