# Supplementary material for: Time trends and sex differences in associations between socioeconomic status indicators and overweight-obesity in Mexico (2006–2012)
Source: Springer Nature journal article supplement (doi:10.1186/s12889-015-2608-2), 2015-12-01
Supplement: MOESM1 [file 9751054]

## Additional File 1. Calculation of the wealth index

Weights for the construction of a wealth index were obtained from the 2006 data extracting the first principal component. The obtained weights were then applied to the 2012 data and scores for the pooled sample standardized with respect to 2006, that is, in 2006 the wealth index has zero mean and unit variance.

**Table AF1-1. Correlations of items with first principal component and scoring coefficients**

| Item                             | Correlations with First Principal Component | Scoring coefficients* |
|----------------------------------|---------------------------------------------|-----------------------|
| Household materials and services |                                             |                       |
| Floor characteristics            | 0.654                                       | 0.153                 |
| Ceiling characteristics          | 0.511                                       | 0.120                 |
| Water facilities                 | 0.568                                       | 0.133                 |
| Electricity                      | 0.277                                       | 0.065                 |
| Possession of durable goods      |                                             |                       |
| Car                              | 0.490                                       | 0.115                 |
| Wagon                            | 0.203                                       | 0.048                 |
| Audio system                     | 0.562                                       | 0.132                 |
| Refrigerator                     | 0.677                                       | 0.159                 |
| Gas stove                        | 0.662                                       | 0.155                 |
| Boiler                           | 0.635                                       | 0.149                 |
| Computer                         | 0.489                                       | 0.115                 |
| Microwave                        | 0.606                                       | 0.142                 |
| Blender                          | 0.614                                       | 0.144                 |
| Television                       | 0.546                                       | 0.128                 |

The first principal component absorbed 30% (4.27/14) of total variation in 2006

\*Obtained with the regression method

**Table AF1-2. Survey-weighted descriptive statistics of wealth index by survey year**

| Year | Percentiles |      |     |     |     | Mean | Standard Deviation |
|------|-------------|------|-----|-----|-----|------|--------------------|
|      | p5          | p25  | p50 | p75 | p95 |      |                    |
| 2006 | -2.1        | -0.5 | 0.1 | 0.7 | 1.4 | 0.0  | 1.0                |
| 2012 | -1.7        | -0.4 | 0.3 | 0.9 | 1.4 | 0.1  | 0.9                |

The region of wealth index values defined by overlapping the (p5, p95) intervals between survey years was (-1.7, 1.4)

**Table AF1-3. Survey-weighted descriptive statistics of wealth index by area of residence and survey year**

| Year       | Percentiles |      |      |      |     | Mean | Standard Deviation |
|------------|-------------|------|------|------|-----|------|--------------------|
|            | p5          | p25  | p50  | p75  | p95 |      |                    |
| Urban area |             |      |      |      |     |      |                    |
| 2006       | -1.2        | -0.2 | 0.3  | 0.9  | 1.4 | 0.3  | 0.8                |
| 2012       | -1.1        | -0.2 | 0.4  | 0.9  | 1.4 | 0.3  | 0.8                |
| Rural area |             |      |      |      |     |      |                    |
| 2006       | -3.0        | -1.8 | -0.8 | -0.2 | 0.6 | -1.0 | 1.1                |
| 2012       | -2.5        | -1.3 | -0.5 | 0.1  | 0.9 | -0.6 | 1.0                |

In the urban area the region of wealth index values defined by overlapping the (p5, p95) intervals between survey years was (-1.1, 1.4)

In the rural area the region of wealth index values defined by overlapping the (p5, p95) intervals between survey years was (-2.5, 0.6)
