# Supplementary material for: Time trends and sex differences in associations between socioeconomic status indicators and overweight-obesity in Mexico (2006–2012)
Source: Springer Nature journal article supplement (doi:10.1186/s12889-015-2608-2), 2015-12-01
Supplement: MOESM7 [file 9751054]

## Additional File 7. Estimates from interactions with area of residence

### OWOB (BMI $\geq$ 25) prevalences by survey year, level of education and area of residence for men

|                    | Men Urban                   |                               | Men Rural                    |                              |
|--------------------|-----------------------------|-------------------------------|------------------------------|------------------------------|
|                    | 2006                        | 2012                          | 2006                         | 2012                         |
| No education       | 65.0 <sup>a</sup> $\pm$ 4.2 | 77.2 <sup>ab*</sup> $\pm$ 3.1 | 64.2 <sup>a</sup> $\pm$ 5.1  | 63.6 <sup>a</sup> $\pm$ 3.9  |
| Elementary school  | 66.5 <sup>a</sup> $\pm$ 2.9 | 72.9 <sup>a</sup> $\pm$ 1.8   | 68.1 <sup>ab</sup> $\pm$ 4.4 | 67.9 <sup>a</sup> $\pm$ 3.2  |
| Middle school      | 65.9 <sup>a</sup> $\pm$ 3.1 | 73.1 <sup>ab*</sup> $\pm$ 1.8 | 74.0 <sup>b</sup> $\pm$ 4.2  | 71.9 <sup>b</sup> $\pm$ 3.1  |
| High school        | 67.3 <sup>a</sup> $\pm$ 3.4 | 76.8 <sup>b*</sup> $\pm$ 1.9  | 66.6 <sup>ab</sup> $\pm$ 5.4 | 74.5 <sup>b</sup> $\pm$ 3.6  |
| College/University | 66.5 <sup>a</sup> $\pm$ 4.3 | 77.0 <sup>ab*</sup> $\pm$ 2.1 | 58.8 <sup>ab</sup> $\pm$ 8.7 | 80.4 <sup>b*</sup> $\pm$ 4.0 |

Overweight plus obesity defined as BMI $\geq$ 25

All estimates are covariate-adjusted prevalences  $\pm$  standard errors obtained through predictive margins from a survey design-based multiple logistic regression model. Country region, area of residence, a wealth index and its squared term, age and age squared, marital status and occupational status were included in the model. All up to forth-way interactions of each adjustment covariate with survey year, sex and area of residence were also included in the model. Different letters indicate significant differences (P<0.05) between covariate categories in the same sex and survey year. \*P<0.05 change from 2006 to 2012 within sex

### Obesity (BMI $\geq$ 30) prevalences by survey year, marital status and area of residence for women

|                      | Women Urban                 |                              | Women Rural                  |                              |
|----------------------|-----------------------------|------------------------------|------------------------------|------------------------------|
|                      | 2006                        | 2012                         | 2006                         | 2012                         |
| Single               | 33.4 <sup>a</sup> $\pm$ 1.9 | 36.7 <sup>a</sup> $\pm$ 1.6  | 23.5 <sup>a</sup> $\pm$ 3.4  | 33.7 <sup>a*</sup> $\pm$ 2.9 |
| Married/cohabitating | 35.6 <sup>a</sup> $\pm$ 1.1 | 39.0 <sup>a*</sup> $\pm$ 0.9 | 33.3 <sup>b</sup> $\pm$ 2.1  | 35.6 <sup>a</sup> $\pm$ 1.7  |
| Widowed/separated    | 36.5 <sup>a</sup> $\pm$ 2.0 | 38.7 <sup>a</sup> $\pm$ 1.5  | 28.3 <sup>ab</sup> $\pm$ 3.0 | 37.3 <sup>a*</sup> $\pm$ 2.4 |

Obesity defined as BMI $\geq$ 30

All estimates are covariate-adjusted prevalences  $\pm$  standard errors obtained through predictive margins from a survey design-based multiple logistic regression model. Country region, area of residence, a wealth index and its squared term, age and age squared, education level and occupational status were included in the model. All up to forth-way interactions of each adjustment covariate with survey year, sex and area of residence were also included in the model. Different letters indicate significant differences (P<0.05) between covariate categories in the same sex and survey year. \*P<0.05 change from 2006 to 2012 within sex
