# Supplementary material for: Time trends and sex differences in associations between socioeconomic status indicators and overweight-obesity in Mexico (2006–2012)
Source: Springer Nature journal article supplement (doi:10.1186/s12889-015-2608-2), 2015-12-01
Supplement: MOESM8 [file 9751054]

**Additional File 8. Comparison of models depending on the inclusion of wealth, education, or both as covariates**

Table 1. Comparison of logistic regression models for overweight plus obesity that differ in whether education, wealth or both groups of variables were included as adjustment covariates.

|                      | Model 1          | Model 2          | Model 3          |
|----------------------|------------------|------------------|------------------|
| <b>Men 2006</b>      |                  |                  |                  |
| Wealth index         | 1.308*** ± 0.070 |                  | 1.302*** ± 0.066 |
| Wealth index squared | 0.987 ± 0.023    |                  | 0.990 ± 0.021    |
| No education         |                  | 1                | 1                |
| Elementary school    |                  | 1.372** ± 0.137  | 1.174 ± 0.125    |
| Middle school        |                  | 1.521*** ± 0.187 | 1.184 ± 0.157    |
| High school          |                  | 1.639*** ± 0.231 | 1.189 ± 0.183    |
| College/University   |                  | 1.692** ± 0.330  | 1.142 ± 0.234    |
| <b>Men 2012</b>      |                  |                  |                  |
| Wealth index         | 1.298*** ± 0.052 |                  | 1.231*** ± 0.056 |
| Wealth index squared | 0.944** ± 0.020  |                  | 0.93*** ± 0.020  |
| No education         |                  | 1                | 1                |
| Elementary school    |                  | 1.154 ± 0.134    | 0.978 ± 0.117    |
| Middle school        |                  | 1.335* ± 0.174   | 1.030 ± 0.141    |
| High school          |                  | 1.699*** ± 0.235 | 1.255 ± 0.185    |
| College/University   |                  | 1.839*** ± 0.285 | 1.299 ± 0.221    |
| <b>Women 2006</b>    |                  |                  |                  |
| Wealth index         | 0.88** ± 0.038   |                  | 0.975 ± 0.043    |
| Wealth index squared | 0.845*** ± 0.017 |                  | 0.873*** ± 0.017 |
| No education         |                  | 1                | 1                |
| Elementary school    |                  | 1.270** ± 0.115  | 1.115 ± 0.104    |
| Middle school        |                  | 1.096 ± 0.126    | 0.938 ± 0.112    |
| High school          |                  | 0.878 ± 0.101    | 0.785* ± 0.093   |
| College/University   |                  | 0.642** ± 0.095  | 0.602*** ± 0.093 |
| <b>Women 2012</b>    |                  |                  |                  |
| Wealth index         | 0.991 ± 0.036    |                  | 1.079 ± 0.046    |
| Wealth index squared | 0.852*** ± 0.016 |                  | 0.884*** ± 0.018 |
| No education         |                  | 1                | 1                |
| Elementary school    |                  | 1.671*** ± 0.152 | 1.452*** ± 0.136 |
| Middle school        |                  | 1.534*** ± 0.156 | 1.262* ± 0.135   |
| High school          |                  | 1.226 ± 0.144    | 0.999 ± 0.125    |
| College/University   |                  | 0.883 ± 0.105    | 0.740* ± 0.100   |

Coefficients are odds ratios ± standard error. \*p<0.01; \*\*p<0.05; \*\*\*p<0.001.

The three models included the following adjustment covariates: indicator variables of marital status, indicator variables of occupation status, age, age squared, indicator variables of country region and of area of residence. All up to three way interactions of each covariate with survey year and sex were also included. For brevity only coefficients related to wealth or education level are presented. Model 1 excluded the group of covariates of education level, model 2 excluded the wealth index and Model 3 corresponds to the model presented in the main results of this research.

Table 2. Comparison of logistic regression models for obesity that differ in whether education, wealth or both groups of variables were included as adjustment covariates.

|                      | Model 1          | Model 2          | Model 3          |
|----------------------|------------------|------------------|------------------|
| <b>Men 2006</b>      |                  |                  |                  |
| Wealth index         | 1.239*** ± 0.061 |                  | 1.263*** ± 0.067 |
| Wealth index squared | 0.950 ± 0.025    |                  | 0.963 ± 0.026    |
| No education         |                  | 1                | 1                |
| Elementary school    |                  | 1.484** ± 0.194  | 1.277 ± 0.169    |
| Middle school        |                  | 1.514** ± 0.229  | 1.205 ± 0.187    |
| High school          |                  | 1.582* ± 0.286   | 1.191 ± 0.227    |
| College/University   |                  | 1.493* ± 0.267   | 1.064 ± 0.200    |
| <b>Men 2012</b>      |                  |                  |                  |
| Wealth index         | 1.204*** ± 0.047 |                  | 1.18*** ± 0.051  |
| Wealth index squared | 0.914*** ± 0.022 |                  | 0.913*** ± 0.022 |
| No education         |                  | 1                | 1                |
| Elementary school    |                  | 1.215 ± 0.154    | 1.071 ± 0.138    |
| Middle school        |                  | 1.438** ± 0.189  | 1.183 ± 0.161    |
| High school          |                  | 1.465** ± 0.206  | 1.177 ± 0.169    |
| College/University   |                  | 1.486** ± 0.209  | 1.167 ± 0.175    |
| <b>Women 2006</b>    |                  |                  |                  |
| Wealth index         | 0.909** ± 0.034  |                  | 1.004 ± 0.044    |
| Wealth index squared | 0.84*** ± 0.018  |                  | 0.87*** ± 0.019  |
| No education         |                  | 1                | 1                |
| Elementary school    |                  | 1.178 ± 0.102    | 1.054 ± 0.093    |
| Middle school        |                  | 1.048 ± 0.114    | 0.927 ± 0.105    |
| High school          |                  | 0.775* ± 0.089   | 0.711** ± 0.090  |
| College/University   |                  | 0.615*** ± 0.080 | 0.587*** ± 0.087 |
| <b>Women 2012</b>    |                  |                  |                  |
| Wealth index         | 0.96 ± 0.030     |                  | 1.029 ± 0.035    |
| Wealth index squared | 0.857*** ± 0.017 |                  | 0.881*** ± 0.018 |
| No education         |                  | 1                | 1                |
| Elementary school    |                  | 1.357*** ± 0.112 | 1.234* ± 0.103   |
| Middle school        |                  | 1.142 ± 0.106    | 1.019 ± 0.097    |
| High school          |                  | 0.991 ± 0.107    | 0.892 ± 0.100    |
| College/University   |                  | 0.772* ± 0.093   | 0.725* ± 0.093   |

Coefficients are odds ratios ± standard error. \*p<0.01; \*\*p<0.05; \*\*\*p<0.001.

The three models included the following adjustment covariates: indicator variables of marital status, indicator variables of occupation status, age, age squared, indicator variables of country region and of area of residence. All up to three way interactions of each covariate with survey year and sex were also included. For brevity only coefficients related to wealth or education level are presented. Model 1 excluded the group of covariates of education level, model 2 excluded the wealth index and Model 3 corresponds to the model presented in the main results of this research.
